# Supplementary material for: Inhibition of Mef2a Enhances Neovascularization via Post-transcriptional Regulation of 14q32 MicroRNAs miR-329 and miR-494
Source: PubMed Central journal article supplement — Mol Ther Nucleic Acids. 2017 Mar 14;7:61–70. doi: 10.1016/j.omtn.2017.03.003 (PMC5415962; doi:10.1016/j.omtn.2017.03.003), 2017-03-14
Supplement: mmc1.pdf [file mmc1.pdf]

OMTN, Volume 7

## **Supplemental Information**

### **Inhibition of Mef2a Enhances Neovascularization**

#### **via Post-transcriptional Regulation of 14q32**

#### **MicroRNAs miR-329 and miR-494**

**Sabine M.J. Welten, Margreet R. de Vries, Erna A.B. Peters, Sudhir Agrawal, Paul H.A. Quax, and A. Yaël Nossent**

A

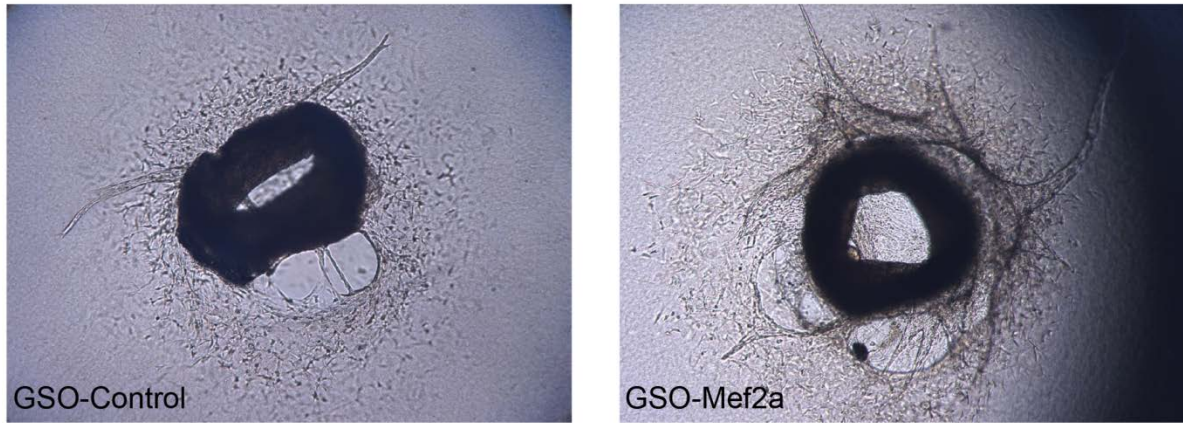

B

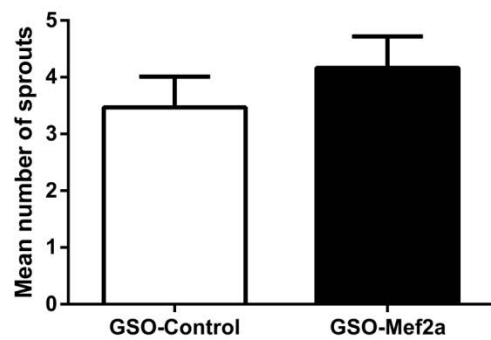

**Supplemental Figure 1. Ex vivo sprouting angiogenesis.** (A) Outgrowth of neovessels from 5-day collagen-embedded aortic rings treated with GSO-Control or GSO-Mef2a. (B) Quantification of neovessels. Data are presented as mean  $\pm$  SEM and represent 3 independent experiments with 10 rings per condition.

**Supplementary Table 1.** List of primers used for primiR and premiR quantification.

| Gene        | Forward Primer        | Reverse Primer         |
|-------------|-----------------------|------------------------|
| primiR-329  | AAGGTCACGTTGGGGAATTA  | ACCACGAAGCCTCCAAGAT    |
| premiR-329  | TGGTACCGGAAGAGAGGTTTT | AGGTTAGCTGGGTGTGTTTCA  |
| primiR-487b | CTGAGGCGGTGGCTTTG     | GAAGCCAGGCTGCAGAGTC    |
| premiR-487b | TGTCCTCTTCGCTTCACTCA  | TGAAAAAGTGGATGACCCTGT  |
| primiR-494  | TGCCTTTGTTTGCTTTCTGA  | GTCATCAGGGACAGGGAGTG   |
| premiR-494  | GGAGAGGTTGTCCGTGTTGT  | AGGTTTCCCGTGTATGTTTCA  |
| primiR-495  | AGCATCCCTTCACACTCAGG  | GAGCTCTCCAAGGTGAGATTTG |
| premiR-495  | GTTGCCCATGTTATTTTTCG  | AGTGCACCATGTTTGTTCG    |
